# Supplementary material
Source: MDPI journal article supplement (https://www.mdpi.com/2313-4321/6/4/68)
Supplement: s1 [file s1]

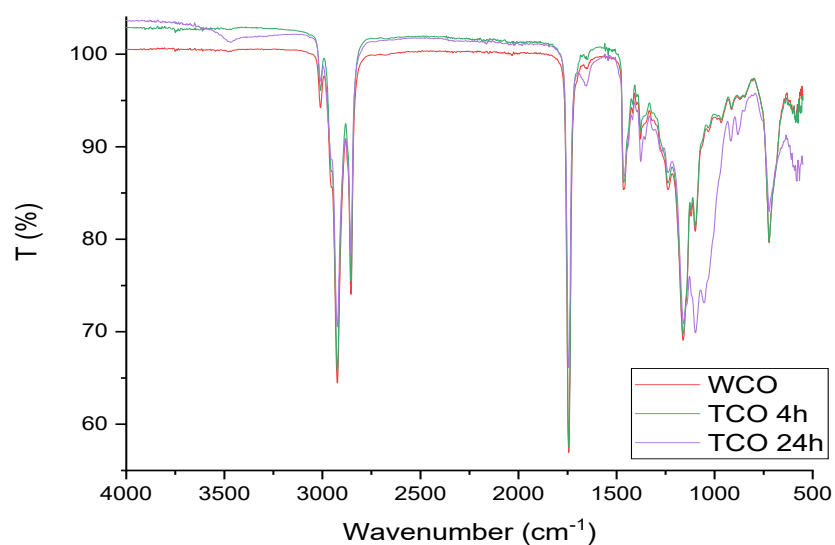

**Figure S1.** FT-IR spectra of waste cooking oil sample (WCO) and samples treated with Na-clays (TCO) after 4 and 24 h.

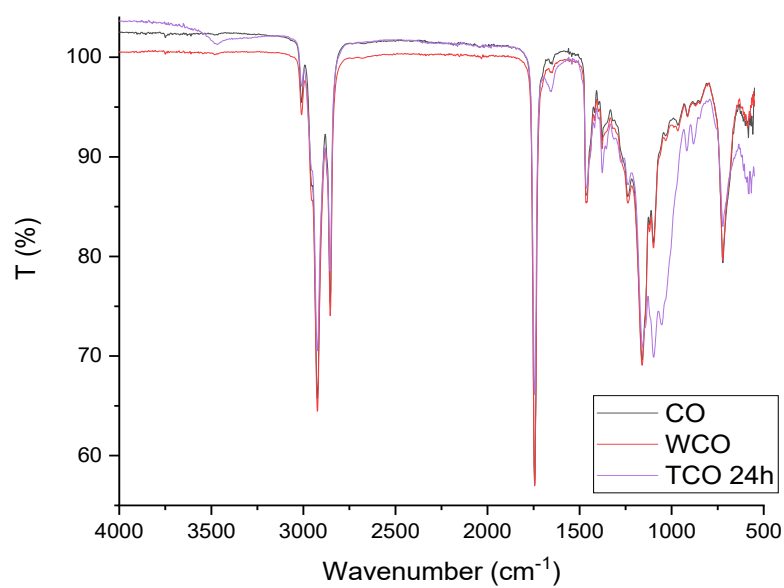

**Figure S2.** FT-IR spectra of edible cooking oil (CO), waste cooking oil (WCO) and 24 h treated cooking oil with Na-clay (TCO).

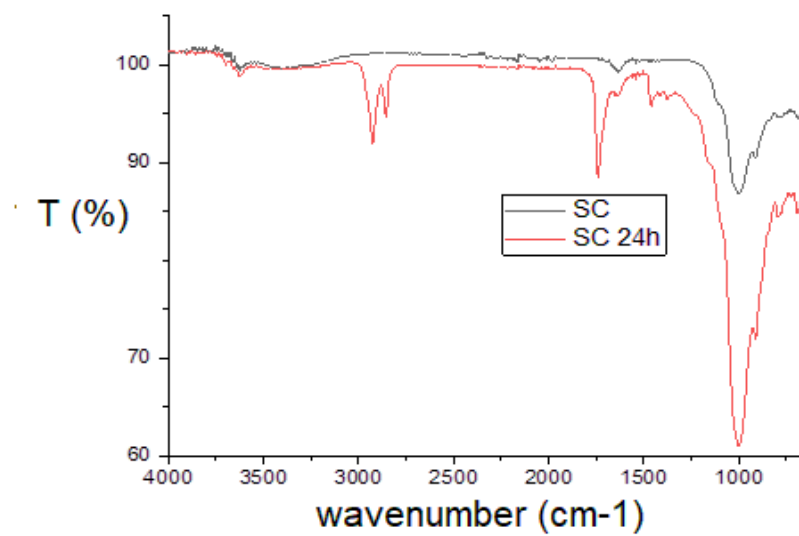

**Figure S3.** FT-IR spectra of Na-caly prior (SC) and after 24 h of waste cooking oil treatment (SC 24 h).

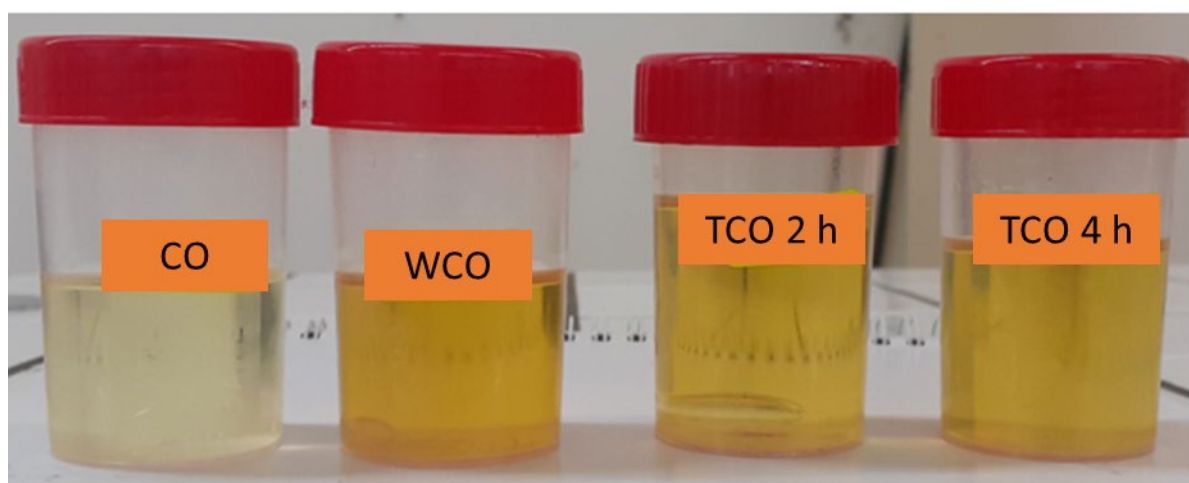

**Figure S4.** Cooking oil (CO), Waste Cooking Oil (WCO), 2 h treated sample (TCO 2h), and 4 h treated samples (TCO 4 h) with Na-clay.
