# Supplementary material
Source: MDPI journal article supplement (https://www.mdpi.com/2313-4321/6/4/68)
Supplement: s1 [file s1]

Archive with 1 entries (1 files):
- recycling-1408993-supplementary.pdf
